# Supplementary material
Source: ML conference proceedings conference paper supplement (https://proceedings.neurips.cc/paper_files/paper/2023/hash/e7407ab5e89c405d28ff6807ffec594a-Abstract.html)
Supplement: Supplementary file 1 [file e7407ab5e89c405d28ff6807ffec594a-Supplemental-Conference.pdf]

## 365 **StyleGAN knows Normal, Depth, Albedo and More – Supplement**

366 We provide additional qualitative figures for intrinsic image predictions from StyleGAN – normals in  
367 Figure 10, depth in Figure 11, albedo-shading decomposition in Figure 12, and segmentation of lamps  
368 and pillows in Figure 13, segmentation of windows and paintings in Figure 14 and segmentation of  
369 beds in Figure 15. In our experiments, we generated three-channel output for each depth, shading,  
370 and segmentation from StyleGAN. We took the mean for each of them to get the final single-  
371 channel estimate. We also provide additional examples of robustness against lighting changes for the  
372 segmentation task in Figure 16.

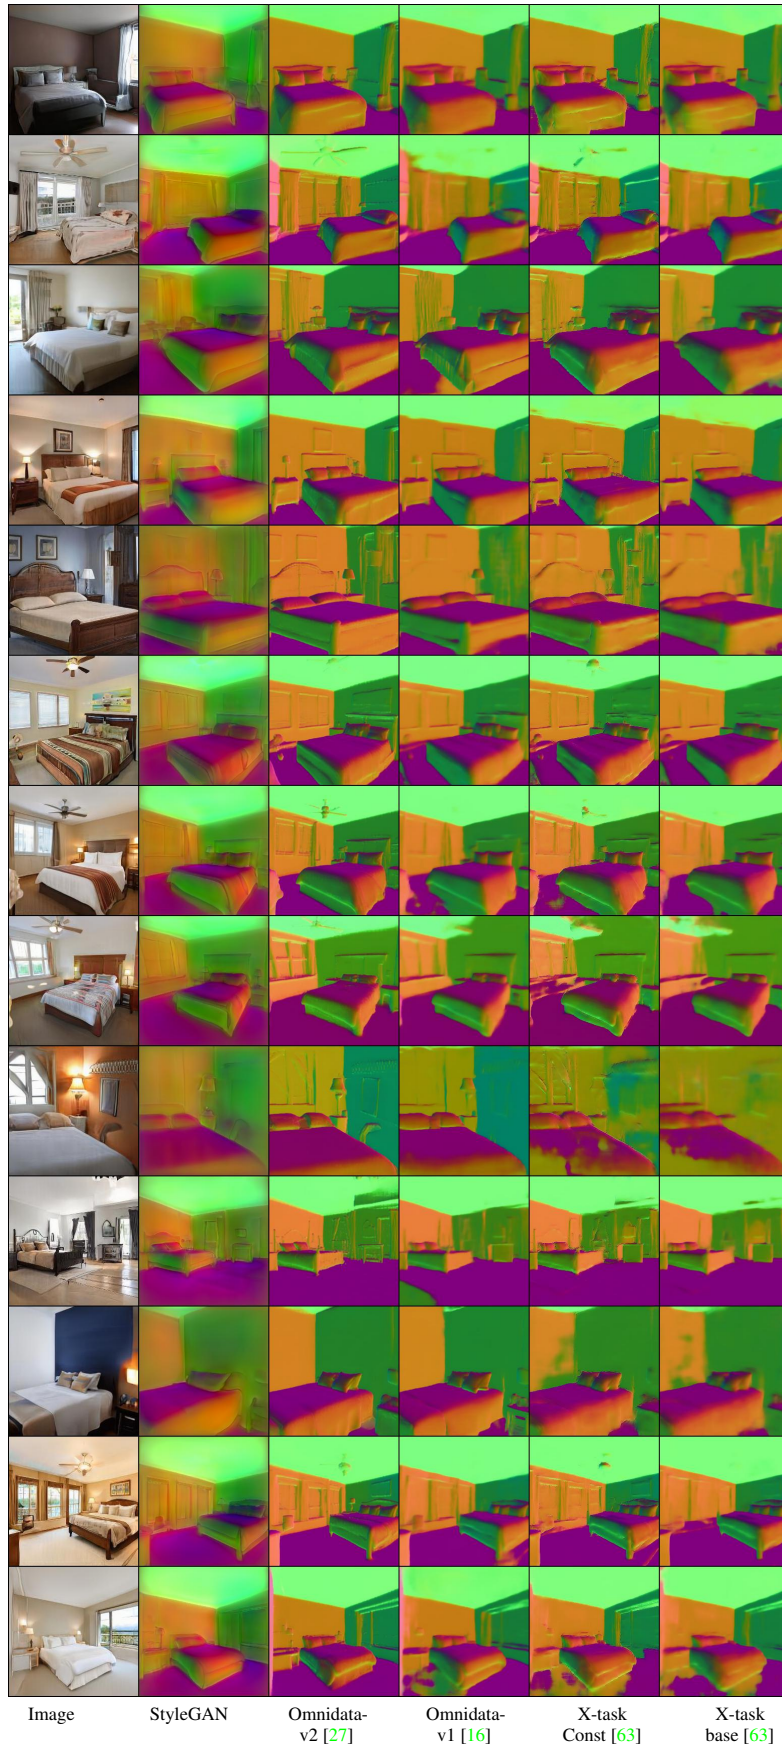

Figure 10: **Additional Normal generation.**

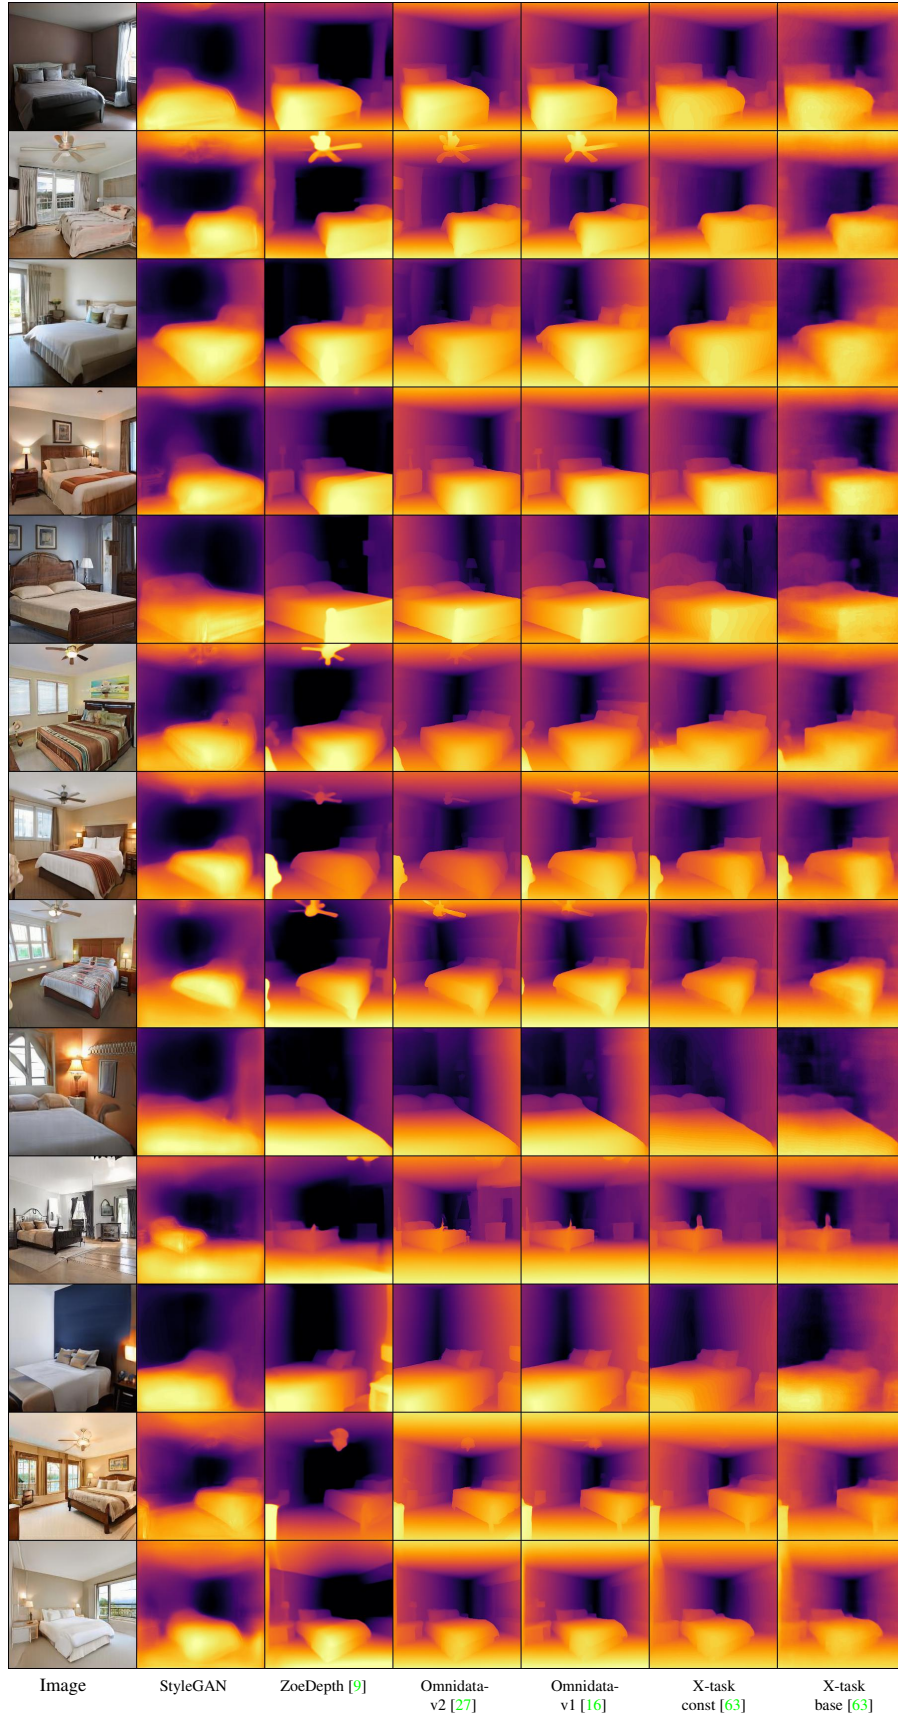

Figure 11: **Additional Depth Estimation Comparison.**

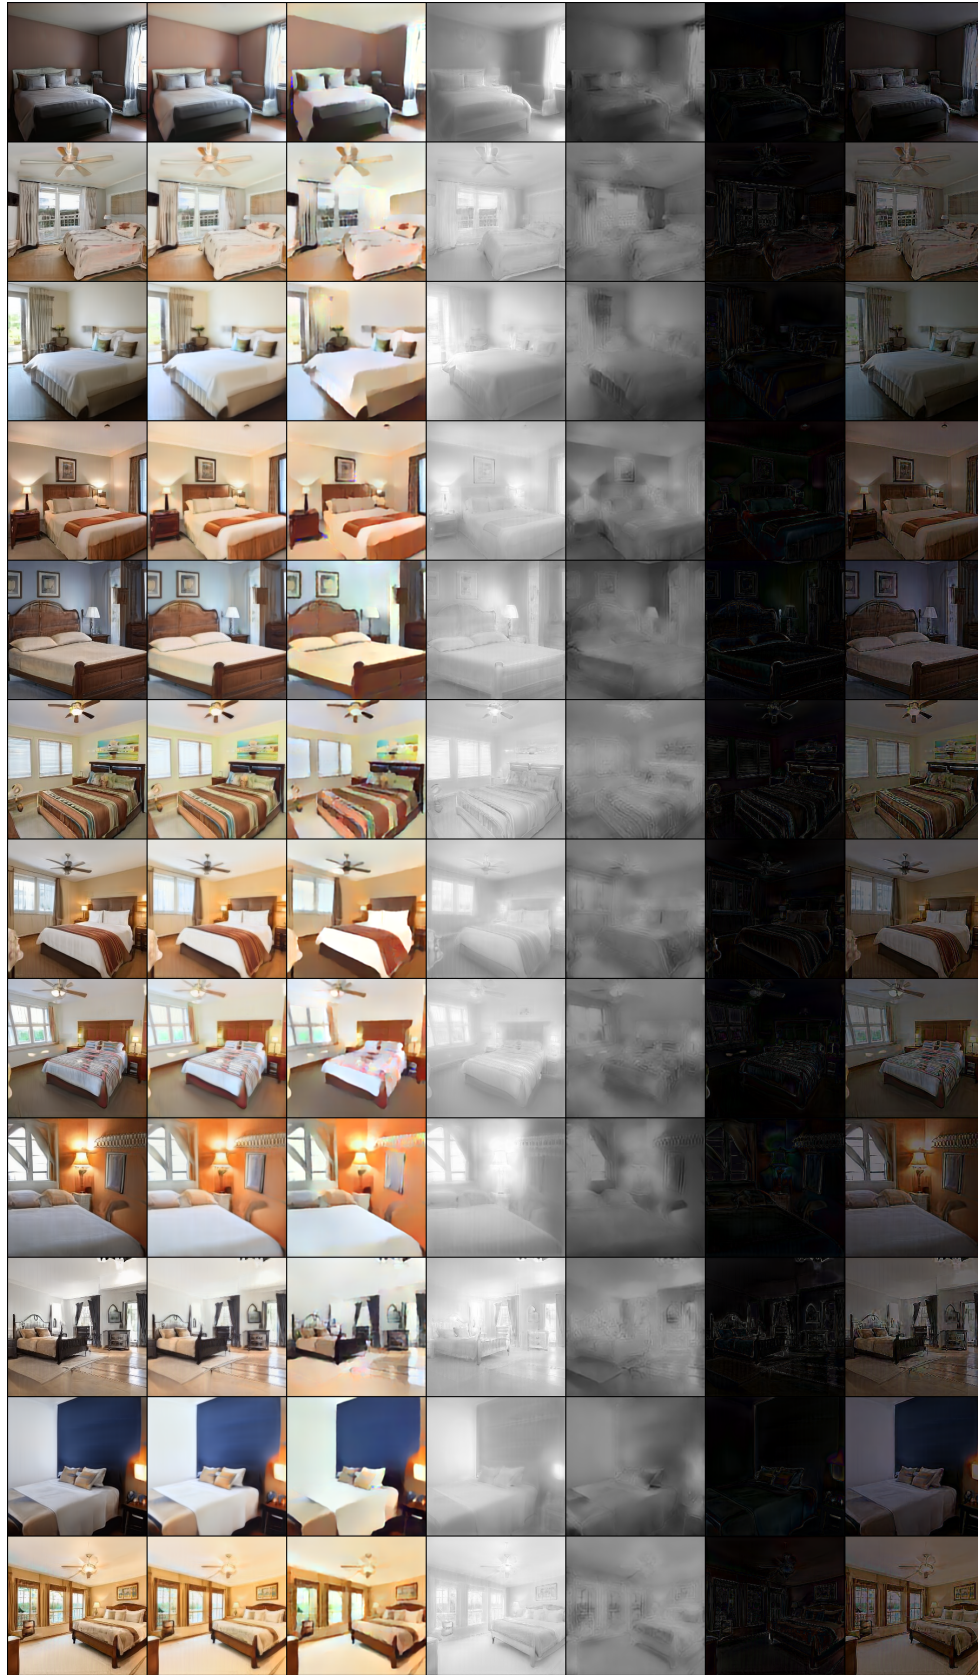

Image Albedo-G Albedo-R Shading-G Shading-R Residual-G Residual-R  
Figure 12: **Additional Results for Albedo-Shading Recovery with StyleGAN.**

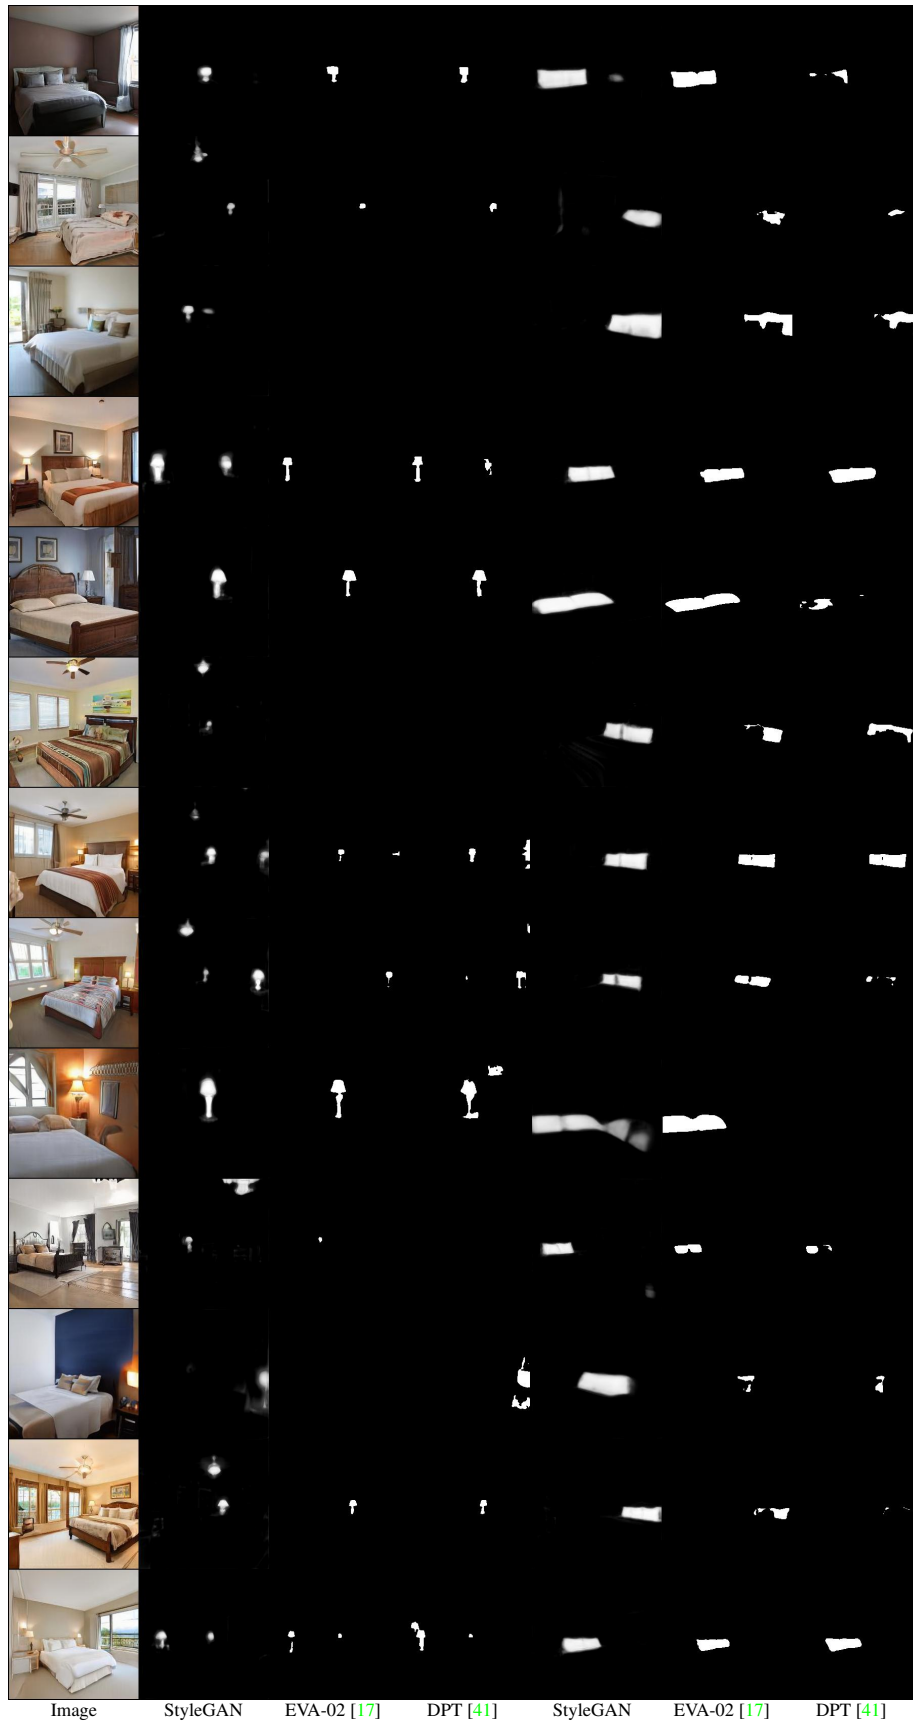

Figure 13: Further segmentation of lamps on the left and pillows on the right.

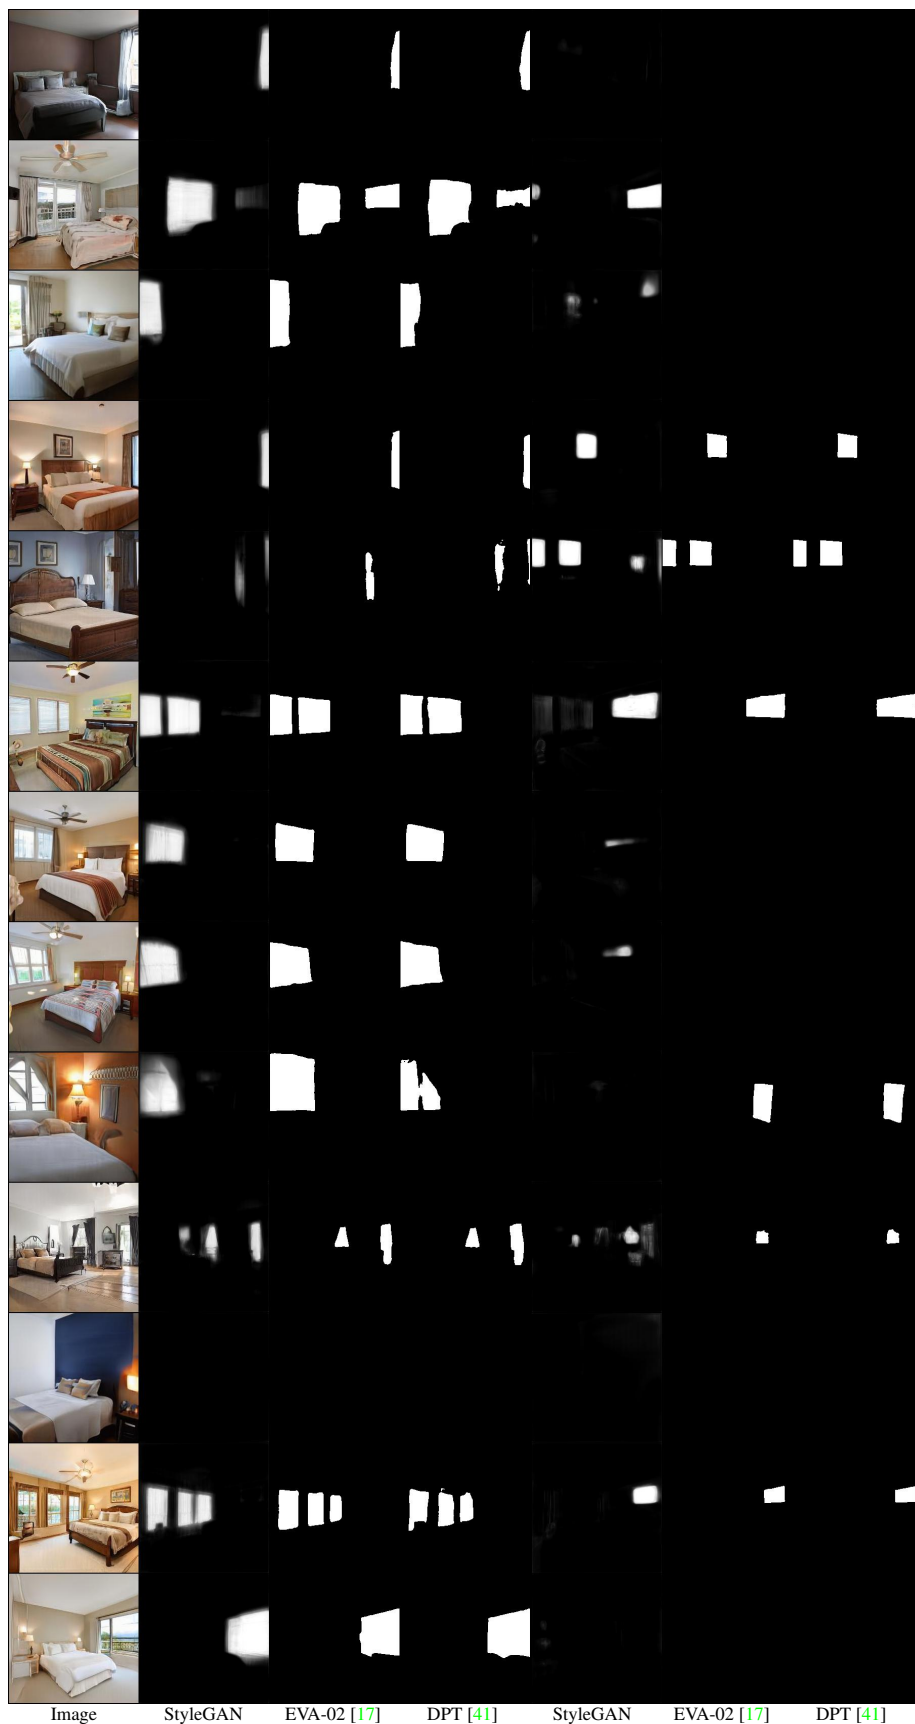

Figure 14: Window segmentation on the left and painting segmentation on the right.

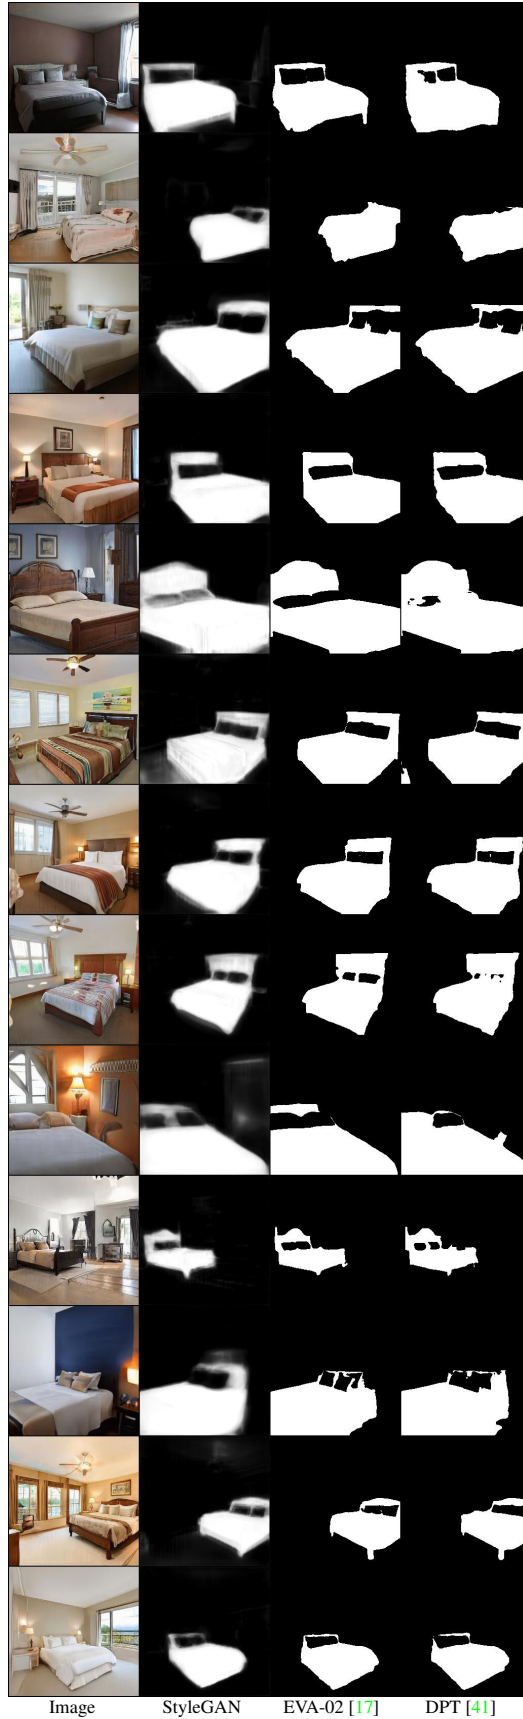

Figure 15: **Bed segmentation comparison.**

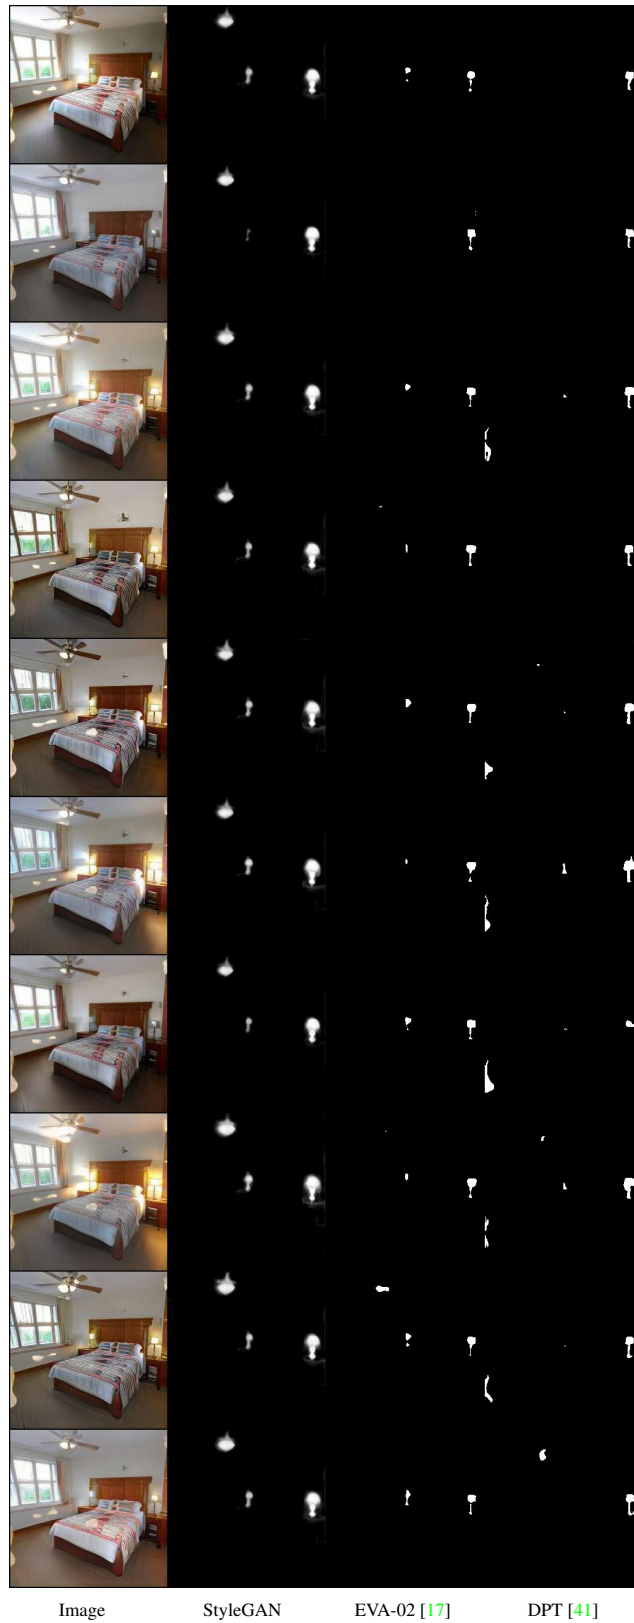

Figure 16: **Additional examples for robustness against lighting for segmentation.**
